# Supplementary material
Source: publisher figshare collection journal article supplement (https://tandf.figshare.com/ndownloader/files/40902678)
Supplement: Supplementary file 1 [file 40902678]

**Table 1. Regression with Independents Included**

|  | (1) Risk | (2) Infection | (3) Hospitalization | (4) Death |
| --- | --- | --- | --- | --- |
| Party ID (Democrat) | 0.391 | 5.081 | 5.711 | 5.077 |
|  | (0.062)*** | (0.874)*** | (1.040)*** | (0.959)*** |
| Party ID (Independent) | 0.232 | 1.526 | 1.323 | 4.197 |
|  | (0.077)*** | (1.394) | (1.635) | (1.624)*** |
| Wave | -0.008 | -0.054 | -0.356 | -0.204 |
|  | (0.001)*** | (0.022)** | (0.024)*** | (0.021)*** |
| Party ID (D) X Wave | -0.000 | -0.061 | -0.061 | -0.029 |
|  | (0.002) | (0.030)** | (0.032)* | (0.028) |
| Party ID (I) X Wave | 0.005 | 0.078 | 0.167 | 0.088 |
|  | (0.003)* | (0.046)* | (0.055)*** | (0.050)* |
| Vaccination | -0.077 | -8.282 | -3.946 | -3.288 |
|  | (0.026)*** | (0.422)*** | (0.488)*** | (0.442)*** |
| Age | -0.041 | -0.210 | 4.135 | 3.891 |
|  | (0.017)** | (0.300) | (0.386)*** | (0.385)*** |
| Children | -0.033 | 0.900 | 0.015 | 0.046 |
|  | (0.032) | (0.614) | (0.746) | (0.731) |
| Health | 0.110 | 3.219 | 6.175 | 5.732 |
|  | (0.019)*** | (0.369)*** | (0.484)*** | (0.476)*** |
| No Comorbidity | 0.012 | -0.720 | -3.494 | -2.307 |
|  | (0.034) | (0.657) | (0.757)*** | (0.751)*** |
| Covid | 0.055 | 1.079 | -1.045 | -0.939 |
|  | (0.047) | (0.937) | (1.167) | (1.167) |
| Covid Death | 0.079 | 1.736 | 1.289 | 1.704 |
|  | (0.022)*** | (0.529)*** | (0.584)** | (0.600)*** |
| Mixed Area | -0.006 | -0.530 | -1.010 | -1.089 |
|  | (0.044) | (0.850) | (1.050) | (1.043) |
| Urban Area | 0.001 | -0.840 | -0.686 | -0.703 |
|  | (0.050) | (0.986) | (1.191) | (1.193) |
| Insurance | -0.047 | -0.933 | -0.898 | -1.571 |
|  | (0.047) | (1.064) | (1.243) | (1.246) |
| Gender (male) | 0.020 | -1.961 | 0.117 | -0.734 |
|  | (0.032) | (0.603)*** | (0.739) | (0.735) |
| Education | -0.021 | -0.368 | -1.887 | -2.572 |
|  | (0.023) | (0.403) | (0.503)*** | (0.498)*** |
| Income | -0.060 | -0.761 | -2.138 | -2.265 |
|  | (0.016)*** | (0.306)** | (0.383)*** | (0.383)*** |
| Black | 0.116 | -3.100 | -2.732 | -2.300 |
|  | (0.063)* | (1.156)*** | (1.367)** | (1.376)* |
| Hispanic | 0.096 | 2.252 | 2.077 | 2.728 |
|  | (0.062) | (1.141)** | (1.292) | (1.246)** |
| Other | 0.199 | 0.470 | 2.239 | 2.114 |
|  | (0.060)*** | (1.117) | (1.383) | (1.314) |
| Constant | 2.478 | 16.179 | 10.751 | 7.438 |
|  | (0.139)*** | (3.009)*** | (4.048)*** | (4.195)* |
|  |  |  |  |  |
| Observations | 32580 | 144523 | 144521 | 144511 |
| R2 | 0.196 | 0.070 | 0.183 | 0.187 |

**Table 2. Regression with Independents Included**

|  | (1) Risk | (2) Infection | (3) Hospitalization | (4) Death |
| --- | --- | --- | --- | --- |
| Party ID (Democrat) | 0.349 | 2.637 | 2.890 | 3.183 |
|  | (0.052)*** | (0.802)*** | (1.025)*** | (0.956)*** |
| Party ID (Independent) | 0.286 | 1.582 | 1.782 | 2.946 |
|  | (0.065)*** | (1.421) | (1.656) | (1.692)* |
| Wave | -0.006 | -0.049 | -0.401 | -0.232 |
|  | (0.001)*** | (0.022)** | (0.023)*** | (0.021)*** |
| Party ID (D) X Vax | -0.088 | -2.274 | -2.548 | -1.790 |
|  | (0.044)** | (0.760)*** | (0.855)*** | (0.736)** |
| Party ID (I) X Vax | 0.103 | 0.424 | -0.195 | -0.794 |
|  | (0.068) | (1.175) | (1.282) | (1.260) |
| Vaccination | -0.139 | -8.253 | -2.984 | -2.532 |
|  | (0.034)*** | (0.661)*** | (0.756)*** | (0.632)*** |
| Age | -0.031 | 0.031 | 5.046 | 4.730 |
|  | (0.019) | (0.350) | (0.442)*** | (0.438)*** |
| Children | -0.004 | 1.197 | 0.107 | 0.283 |
|  | (0.035) | (0.733) | (0.914) | (0.904) |
| Health | 0.076 | 3.505 | 6.908 | 6.237 |
|  | (0.022)*** | (0.406)*** | (0.568)*** | (0.555)*** |
| No Comorbidity | 0.036 | -0.805 | -3.044 | -2.125 |
|  | (0.039) | (0.754) | (0.876)*** | (0.867)** |
| Covid | 0.047 | 1.030 | -2.694 | -1.904 |
|  | (0.057) | (1.141) | (1.485)* | (1.419) |
| Covid Death | 0.008 | 1.916 | 0.834 | 1.232 |
|  | (0.024) | (0.618)*** | (0.698) | (0.677)* |
| Mixed Area | 0.029 | -0.769 | -0.547 | -0.655 |
|  | (0.054) | (1.088) | (1.392) | (1.350) |
| Urban Area | -0.005 | -1.505 | -1.090 | -0.728 |
|  | (0.062) | (1.207) | (1.525) | (1.499) |
| Insurance | -0.203 | -0.254 | 0.463 | 0.343 |
|  | (0.058)*** | (1.512) | (1.824) | (1.794) |
| Gender (male) | 0.001 | -3.454 | -0.958 | -1.599 |
|  | (0.035) | (0.697)*** | (0.885) | (0.872)* |
| Education | -0.022 | -0.620 | -1.798 | -2.539 |
|  | (0.027) | (0.491) | (0.626)*** | (0.623)*** |
| Income | -0.074 | -0.880 | -2.165 | -2.509 |
|  | (0.018)*** | (0.364)** | (0.468)*** | (0.471)*** |
| Black | 0.130 | -2.264 | -2.609 | -2.397 |
|  | (0.070)* | (1.451) | (1.742) | (1.787) |
| Hispanic | 0.109 | 2.515 | 3.758 | 4.293 |
|  | (0.072) | (1.333)* | (1.577)** | (1.489)*** |
| Other | 0.257 | 0.434 | 2.903 | 2.609 |
|  | (0.068)*** | (1.336) | (1.700)* | (1.608) |
| Constant | 2.621 | 17.679 | 8.854 | 5.562 |
|  | (0.160)*** | (3.755)*** | (5.184)* | (5.514) |
|  |  |  |  |  |
| Observations | 17364 | 101122 | 101127 | 101112 |
| R2 | 0.221 | 0.091 | 0.216 | 0.217 |

**Table 3. Regression with One-Dose Vaccination**

|  | (1) Risk | (2) Infection | (3) Hospitalization | (4) Death |
| --- | --- | --- | --- | --- |
| Party ID (Republican) | -0.366 | -2.834 | -3.209 | -3.434 |
|  | (0.049)*** | (0.804)*** | (1.028)*** | (0.962)*** |
| Vaccination | -0.195 | -9.968 | -5.460 | -4.175 |
|  | (0.039)*** | (0.538)*** | (0.555)*** | (0.505)*** |
| Party ID X Vaccination | 0.101 | 2.021 | 2.471 | 1.710 |
|  | (0.042)** | (0.713)*** | (0.797)*** | (0.693)** |
| Wave | -0.007 | -0.014 | -0.379 | -0.215 |
|  | (0.002)*** | (0.024) | (0.026)*** | (0.023)*** |
| Age | -0.026 | -0.119 | 5.048 | 4.765 |
|  | (0.019) | (0.360) | (0.456)*** | (0.445)*** |
| Children | 0.003 | 1.207 | 0.812 | 1.099 |
|  | (0.035) | (0.733)* | (0.937) | (0.907) |
| Health | 0.076 | 3.206 | 6.825 | 6.083 |
|  | (0.022)*** | (0.399)*** | (0.565)*** | (0.539)*** |
| No Comorbidity | 0.050 | -0.241 | -2.803 | -1.997 |
|  | (0.039) | (0.754) | (0.870)*** | (0.847)** |
| Covid | 0.055 | 1.650 | -2.176 | -1.588 |
|  | (0.057) | (1.119) | (1.483) | (1.428) |
| Covid Death | 0.022 | 2.103 | 1.219 | 1.675 |
|  | (0.025) | (0.606)*** | (0.700)* | (0.695)** |
| Mixed Area | 0.028 | -1.128 | -0.789 | -0.935 |
|  | (0.056) | (1.097) | (1.409) | (1.370) |
| Urban Area | -0.006 | -1.350 | -0.476 | 0.061 |
|  | (0.064) | (1.210) | (1.540) | (1.512) |
| Insurance | -0.185 | -0.055 | 1.140 | 0.650 |
|  | (0.057)*** | (1.490) | (1.854) | (1.784) |
| Gender (male) | 0.002 | -3.287 | -0.501 | -1.230 |
|  | (0.035) | (0.696)*** | (0.894) | (0.866) |
| Education | -0.041 | -0.811 | -1.970 | -2.780 |
|  | (0.027) | (0.488)* | (0.636)*** | (0.627)*** |
| Income | -0.071 | -1.115 | -2.418 | -2.649 |
|  | (0.019)*** | (0.362)*** | (0.469)*** | (0.464)*** |
| Black | 0.066 | -2.784 | -3.336 | -3.445 |
|  | (0.071) | (1.457)* | (1.729)* | (1.761)* |
| Hispanic | 0.110 | 2.976 | 3.776 | 4.308 |
|  | (0.072) | (1.363)** | (1.599)** | (1.491)*** |
| Other | 0.197 | -0.998 | 1.432 | 1.063 |
|  | (0.070)*** | (1.243) | (1.620) | (1.471) |
| Constant | 3.049 | 24.006 | 14.205 | 12.082 |
|  | (0.173)*** | (3.653)*** | (5.258)*** | (5.425)** |
|  |  |  |  |  |
| Observations | 17502 | 101248 | 101243 | 101233 |
| R2 | 0.208 | 0.090 | 0.219 | 0.222 |

**Table 4. Unweighted Demographics by Wave with CPS Comparison**

| Wave | | | | | | | | | | | | | | | | | | | | | | | | | | | | | | | |
| --- | --- | --- | --- | --- | --- | --- | --- | --- | --- | --- | --- | --- | --- | --- | --- | --- | --- | --- | --- | --- | --- | --- | --- | --- | --- | --- | --- | --- | --- | --- | --- |
|  | 1 | 2 | 3 | 4 | 5 | 6 | 7 | 8 | 9 | 10 | 11 | 12 | 13 | 14 | 15 | 16 | 17 | 18 | 19 | 20 | 21 | 22 | 23 | 24 | 25 | 26 | 27 | 28 | 29 | 30 | CPS |
| **Race** |  |  |  |  |  |  |  |  |  |  |  |  |  |  |  |  |  |  |  |  |  |  |  |  |  |  |  |  |  |  |  |
| White | 65.4 | 68 | 66.9 | 66.6 | 66.7 | 66.5 | 66.3 | 66.8 | 66.2 | 65.9 | 66.3 | 66.4 | 66.5 | 66.8 | 67.9 | 67.2 | 66.7 | 67.1 | 67.2 | 67 | 66.9 | 67.1 | 66.8 | 67.2 | 66.6 | 66.7 | 66.6 | 66.6 | 67.4 | 66.7 | 61.8 |
| Black | 7.8 | 7.6 | 7.6 | 7.6 | 7.6 | 7.4 | 7.7 | 7.5 | 7.7 | 7.8 | 7.7 | 7.7 | 7.6 | 7.7 | 7.9 | 7.9 | 7.8 | 7.7 | 7.5 | 7.9 | 7.7 | 7.7 | 7.7 | 7.6 | 7.4 | 7.6 | 7.3 | 7.7 | 7.8 | 8 | 12.0 |
| Hispanic | 16.5 | 14.9 | 15.5 | 15.6 | 15.5 | 15.5 | 15.6 | 15.3 | 15.6 | 15.8 | 15.3 | 15.5 | 15.4 | 15.1 | 13.8 | 14.5 | 14.9 | 14.8 | 14.9 | 14.8 | 14.8 | 14.6 | 14.8 | 14.7 | 15.5 | 15.3 | 15.2 | 14.9 | 14.3 | 14.9 | 17.2 |
| Other | 10.3 | 9.5 | 10 | 10.2 | 10.2 | 10.6 | 10.4 | 10.3 | 10.5 | 10.5 | 10.7 | 10.4 | 10.5 | 10.4 | 10.4 | 10.4 | 10.6 | 10.4 | 10.4 | 10.4 | 10.6 | 10.5 | 10.7 | 10.5 | 10.5 | 10.5 | 10.8 | 10.8 | 10.6 | 10.4 | 8.8 |
| **Age** |  |  |  |  |  |  |  |  |  |  |  |  |  |  |  |  |  |  |  |  |  |  |  |  |  |  |  |  |  |  |  |
| 18-34 | 20.7 | 19 | 19.2 | 18.9 | 18.7 | 18.6 | 18.3 | 17.9 | 17.9 | 18.2 | 18 | 18.2 | 17.9 | 17.4 | 17.4 | 17.3 | 17.7 | 16.7 | 16.7 | 16.7 | 16.7 | 16.4 | 16.3 | 16.3 | 16.3 | 16.2 | 16.2 | 16.1 | 15.6 | 16.9 | 28.6 |
| 35-54 | 37.3 | 37 | 37.9 | 38.2 | 38.2 | 38.1 | 38 | 37.6 | 37.7 | 38 | 37.7 | 37.6 | 37.9 | 37.4 | 37.5 | 37.8 | 37.4 | 37.6 | 37.3 | 37.1 | 37.2 | 37.6 | 37.3 | 37.6 | 37.1 | 37.2 | 36.6 | 36.8 | 36.3 | 37.2 | 32.5 |
| 55-64 | 20.3 | 20.6 | 20.3 | 20.4 | 20.3 | 20.4 | 20.8 | 21 | 21 | 20.7 | 20.7 | 20.7 | 20.8 | 21 | 20.9 | 20.7 | 20.6 | 20.7 | 20.7 | 20.9 | 20.8 | 20.8 | 20.8 | 20.6 | 20.8 | 20.7 | 20.8 | 20.7 | 20.9 | 20.2 | 16.5 |
| 65+ | 21.6 | 23.4 | 22.5 | 22.5 | 22.8 | 22.9 | 22.9 | 23.5 | 23.4 | 23.1 | 23.6 | 23.5 | 23.5 | 24.2 | 24.2 | 24.3 | 24.3 | 25.1 | 25.3 | 25.3 | 25.3 | 25.2 | 25.6 | 25.5 | 25.8 | 25.9 | 26.4 | 26.4 | 27.2 | 25.6 | 22.2 |
| **Education** |  |  |  |  |  |  |  |  |  |  |  |  |  |  |  |  |  |  |  |  |  |  |  |  |  |  |  |  |  |  |  |
| High School or less | 22.2 | 21.2 | 21.8 | 21.5 | 21.5 | 21.5 | 21.5 | 21.7 | 21.3 | 21.3 | 21.2 | 21.5 | 21.6 | 21.4 | 21.2 | 21 | 21 | 20.9 | 21 | 20.9 | 20.8 | 20.6 | 20.8 | 20.8 | 20.7 | 20.6 | 19.9 | 20.2 | 20 | 20.9 | 38.3 |
| Some College | 37.1 | 37.1 | 37.1 | 36.9 | 36.9 | 36.6 | 36.6 | 36.6 | 36.8 | 36.7 | 36.5 | 36.4 | 36.4 | 36.5 | 36.3 | 36.4 | 36.5 | 36.4 | 36.7 | 36.3 | 36.5 | 36.6 | 36.3 | 36 | 36.3 | 36 | 36.1 | 36.1 | 36.1 | 35.8 | 26.3 |
| Bachelor or More | 40.7 | 41.7 | 41.1 | 41.6 | 41.7 | 41.9 | 41.8 | 41.7 | 41.8 | 42 | 42.3 | 42.1 | 42 | 42.1 | 42.5 | 42.6 | 42.6 | 42.7 | 42.4 | 42.8 | 42.6 | 42.8 | 43 | 43.2 | 43 | 43.5 | 43.9 | 43.7 | 43.9 | 43.2 | 35.2 |
| **Gender** |  |  |  |  |  |  |  |  |  |  |  |  |  |  |  |  |  |  |  |  |  |  |  |  |  |  |  |  |  |  |  |
| Female | 58.6 | 57.4 | 58.2 | 58.4 | 58.2 | 58.6 | 58.2 | 59 | 58.6 | 58.4 | 58.7 | 58.8 | 58.7 | 59 | 58.4 | 58.9 | 58.9 | 58.9 | 58.7 | 58.9 | 58.7 | 58.6 | 58.8 | 58.8 | 59.3 | 58.9 | 59 | 59 | 58.8 | 59.2 | 51.3 |
| Male | 41.4 | 42.6 | 41.8 | 41.6 | 41.8 | 41.4 | 41.8 | 41 | 41.4 | 41.6 | 41.3 | 41.2 | 41.3 | 41 | 41.6 | 41.1 | 41.1 | 41.1 | 41.3 | 41.1 | 41.3 | 41.4 | 41.2 | 41.2 | 40.7 | 41.1 | 41 | 41 | 41.2 | 40.8 | 48.6 |
| **Household income categories** |  |  |  |  |  |  |  |  |  |  |  |  |  |  |  |  |  |  |  |  |  |  |  |  |  |  |  |  |  |  |  |
| <$30,000 | 24.3 | 23.7 | 23.4 | 23.4 | 23.3 | 23.4 | 23.8 | 23.8 | 23.9 | 24 | 24.1 | 23.9 | 24.1 | 23.7 | 23.6 | 23.4 | 23.8 | 23.4 | 23.6 | 23.5 | 23.8 | 23.4 | 23.3 | 23.3 | 23.9 | 23.4 | 22.7 | 23 | 22.7 | 23.4 | 17.3 |
| $30,000-$59,999 | 25.6 | 25.4 | 25.3 | 25.3 | 25.4 | 25.2 | 24.9 | 24.7 | 25 | 24.9 | 24.7 | 25.2 | 25.5 | 25.5 | 25.5 | 25.6 | 25.3 | 25.6 | 25.5 | 25.4 | 25.4 | 25.1 | 25.1 | 24.6 | 24.5 | 24.6 | 24.5 | 24.1 | 24.6 | 24.4 | 24.1 |
| $60,000-$99,999 | 24.4 | 24.9 | 25.1 | 25.1 | 25.2 | 25 | 25.1 | 25.6 | 25.2 | 25.3 | 25.3 | 25.1 | 24.8 | 25.3 | 25.1 | 25 | 24.8 | 25.1 | 25.2 | 25 | 24.6 | 25 | 25.2 | 25.3 | 24.8 | 25 | 25.3 | 25.1 | 25.4 | 24.5 | 23.5 |
| >=$100,000 | 25.7 | 26.1 | 26.1 | 26.3 | 26.1 | 26.4 | 26.2 | 26 | 25.9 | 25.8 | 25.9 | 25.7 | 25.6 | 25.5 | 25.7 | 26 | 26.1 | 25.9 | 25.7 | 26.1 | 26.2 | 26.5 | 26.4 | 26.8 | 26.8 | 27.1 | 27.6 | 27.8 | 27.3 | 27.7 | 35.0 |

**Table 5. Model of Risk Over Time (without “leaners”)**

|  | (1) Risk | (2) Infection | (3) Hospitalization | (4) Death |
| --- | --- | --- | --- | --- |
| Party ID (Republican) | -0.208*** | -5.703*** | -5.880*** | -5.462*** |
|  | (0.020) | (0.925) | (1.114) | (1.027) |
| Wave | -0.005*** | -0.108*** | -0.410*** | -0.238*** |
|  | (0.001) | (0.026) | (0.028) | (0.025) |
| Party ID X Wave | -0.004*** | 0.077** | 0.059* | 0.028 |
|  | (0.001) | (0.031) | (0.034) | (0.030) |
| Vaccination | -0.105*** | -8.197*** | -3.748*** | -3.025*** |
|  | (0.012) | (0.469) | (0.548) | (0.481) |
| Age | 0.014 | -0.179 | 4.506*** | 4.251*** |
|  | (0.009) | (0.337) | (0.419) | (0.416) |
| Children | -0.060*** | 1.139* | 0.627 | 0.739 |
|  | (0.017) | (0.678) | (0.831) | (0.806) |
| Health | 0.084*** | 3.173*** | 6.307*** | 5.842*** |
|  | (0.010) | (0.384) | (0.514) | (0.494) |
| No Comorbidity | -0.021 | -0.388 | -3.082*** | -1.934** |
|  | (0.018) | (0.702) | (0.813) | (0.784) |
| Covid | 0.044* | 0.827 | -0.914 | -0.700 |
|  | (0.027) | (1.030) | (1.353) | (1.349) |
| Covid Death | 0.037*** | 2.234*** | 1.879*** | 2.428*** |
|  | (0.011) | (0.571) | (0.642) | (0.657) |
| Mixed Area | 0.012 | -0.391 | -1.300 | -1.663 |
|  | (0.026) | (0.916) | (1.158) | (1.150) |
| Urban Area | 0.017 | -0.385 | -0.322 | -0.366 |
|  | (0.030) | (1.070) | (1.325) | (1.323) |
| Insurance | -0.012 | -0.790 | -0.525 | -1.214 |
|  | (0.030) | (1.192) | (1.406) | (1.369) |
| Gender (male) | -0.036** | -1.858*** | 0.442 | -0.476 |
|  | (0.017) | (0.649) | (0.805) | (0.785) |
| Education | -0.023** | -0.467 | -1.784*** | -2.466*** |
|  | (0.011) | (0.444) | (0.563) | (0.551) |
| Income | -0.034*** | -0.844** | -2.007*** | -2.122*** |
|  | (0.008) | (0.333) | (0.425) | (0.419) |
| Black | 0.109*** | -3.746*** | -3.265** | -3.434** |
|  | (0.032) | (1.320) | (1.581) | (1.582) |
| Hispanic | 0.165*** | 1.236 | 1.728 | 2.467* |
|  | (0.032) | (1.261) | (1.423) | (1.316) |
| Other | 0.137*** | -0.591 | 0.868 | 0.933 |
|  | (0.030) | (1.220) | (1.565) | (1.437) |
| Constant | 2.703*** | 22.516*** | 14.710*** | 12.056** |
|  | (0.083) | (3.498) | (4.637) | (4.732) |
|  |  |  |  |  |
| Observations | 94800 | 116962 | 116964 | 116956 |
| R2 | 0.220 | 0.072 | 0.190 | 0.194 |

**Table 6. Model of Risk by Vaccination Status (without “leaners”)**

|  | (1) Risk | (2) Infection | (3) Hospitalization | (4) Death |
| --- | --- | --- | --- | --- |
| Party ID (Republican) | -0.184*** | -3.273*** | -3.218*** | -3.803*** |
|  | (0.021) | (0.846) | (1.088) | (0.999) |
| Wave | -0.004*** | -0.049** | -0.403*** | -0.240*** |
|  | (0.001) | (0.024) | (0.026) | (0.023) |
| Party ID X Wave | -0.026 | 2.710*** | 2.806*** | 2.248*** |
|  | (0.019) | (0.816) | (0.902) | (0.755) |
| Vaccination | -0.146*** | -10.415*** | -5.422*** | -4.316*** |
|  | (0.012) | (0.569) | (0.599) | (0.539) |
| Age | 0.012 | 0.044 | 5.409*** | 4.893*** |
|  | (0.009) | (0.398) | (0.481) | (0.478) |
| Children | -0.060*** | 1.264 | 0.570 | 0.750 |
|  | (0.019) | (0.805) | (1.002) | (0.981) |
| Health | 0.072*** | 3.545*** | 7.073*** | 6.364*** |
|  | (0.011) | (0.440) | (0.618) | (0.595) |
| No Comorbidity | -0.009 | 0.054 | -2.411** | -1.686* |
|  | (0.020) | (0.813) | (0.946) | (0.918) |
| Covid | 0.037 | 0.942 | -2.356 | -1.590 |
|  | (0.030) | (1.196) | (1.704) | (1.619) |
| Covid Death | 0.013 | 2.111*** | 1.165 | 1.684** |
|  | (0.013) | (0.666) | (0.757) | (0.719) |
| Mixed Area | -0.000 | -0.797 | -0.915 | -1.289 |
|  | (0.030) | (1.181) | (1.511) | (1.460) |
| Urban Area | 0.022 | -1.260 | -0.337 | 0.192 |
|  | (0.034) | (1.301) | (1.671) | (1.637) |
| Insurance | -0.016 | -0.133 | 0.858 | 0.558 |
|  | (0.029) | (1.716) | (1.960) | (1.889) |
| Gender (male) | -0.054*** | -3.061*** | -0.107 | -0.730 |
|  | (0.018) | (0.758) | (0.967) | (0.939) |
| Education | -0.023* | -0.980* | -1.619** | -2.417*** |
|  | (0.012) | (0.538) | (0.701) | (0.692) |
| Income | -0.043*** | -1.007** | -2.072*** | -2.421*** |
|  | (0.009) | (0.401) | (0.517) | (0.512) |
| Black | 0.122*** | -2.899* | -3.295* | -3.527* |
|  | (0.039) | (1.596) | (1.943) | (2.004) |
| Hispanic | 0.180*** | 1.892 | 3.326* | 3.594** |
|  | (0.037) | (1.493) | (1.744) | (1.578) |
| Other | 0.136*** | -0.909 | 1.214 | 0.801 |
|  | (0.032) | (1.460) | (1.904) | (1.743) |
| Constant | 2.723*** | 22.150*** | 10.273* | 9.914 |
|  | (0.100) | (4.157) | (5.853) | (6.101) |
|  |  |  |  |  |
| Observations | 68168 | 82728 | 82729 | 82715 |
| R2 | 0.201 | 0.094 | 0.222 | 0.225 |

**Table 7. Model of Risk Over Time (with Numeracy)**

|  | (1) Risk | (2) Infection | (3) Hospitalization | (4) Death |
| --- | --- | --- | --- | --- |
| Party ID (Republican) | -0.198*** | -5.526*** | -6.263*** | -5.593*** |
|  | (0.021) | (0.930) | (1.093) | (1.020) |
| Wave | -0.005*** | -0.112*** | -0.409*** | -0.227*** |
|  | (0.001) | (0.027) | (0.029) | (0.026) |
| Party ID X Wave | -0.004*** | 0.070** | 0.062* | 0.023 |
|  | (0.001) | (0.032) | (0.034) | (0.030) |
| Vaccination | -0.107*** | -8.250*** | -3.705*** | -3.015*** |
|  | (0.012) | (0.468) | (0.543) | (0.476) |
| Age | 0.017* | -0.273 | 4.435*** | 4.019*** |
|  | (0.009) | (0.345) | (0.433) | (0.431) |
| Children | -0.064*** | 0.954 | 0.838 | 0.744 |
|  | (0.018) | (0.674) | (0.835) | (0.810) |
| Health | 0.084*** | 3.233*** | 6.743*** | 6.161*** |
|  | (0.010) | (0.375) | (0.523) | (0.498) |
| No Comorbidity | -0.021 | -0.636 | -3.408*** | -2.556*** |
|  | (0.018) | (0.710) | (0.818) | (0.787) |
| Covid | 0.045* | 0.061 | -2.327* | -2.365* |
|  | (0.027) | (0.983) | (1.282) | (1.266) |
| Covid Death | 0.041*** | 2.250*** | 1.744*** | 2.277*** |
|  | (0.012) | (0.577) | (0.647) | (0.663) |
| Mixed Area | 0.016 | -0.654 | -0.957 | -1.036 |
|  | (0.026) | (0.935) | (1.165) | (1.140) |
| Urban Area | 0.022 | -0.761 | -0.476 | -0.356 |
|  | (0.030) | (1.087) | (1.316) | (1.302) |
| Insurance | -0.010 | 0.136 | 0.403 | -0.214 |
|  | (0.033) | (1.213) | (1.450) | (1.414) |
| Gender (male) | -0.036* | -1.639** | 1.182 | 0.600 |
|  | (0.018) | (0.672) | (0.841) | (0.824) |
| Education | -0.018 | -0.091 | -0.997* | -1.116* |
|  | (0.012) | (0.472) | (0.603) | (0.580) |
| Income | -0.024*** | -0.421 | -1.484*** | -1.276*** |
|  | (0.009) | (0.336) | (0.444) | (0.437) |
| Black | 0.108*** | -4.401*** | -5.216*** | -5.448*** |
|  | (0.035) | (1.374) | (1.669) | (1.630) |
| Hispanic | 0.164*** | 1.162 | 0.884 | 1.536 |
|  | (0.034) | (1.274) | (1.441) | (1.332) |
| Other | 0.139*** | -0.908 | -0.371 | 0.824 |
|  | (0.032) | (1.140) | (1.464) | (1.389) |
| Numeracy | -0.001 | -0.137*** | -0.284*** | -0.424*** |
|  | (0.001) | (0.042) | (0.053) | (0.051) |
| Constant | 2.733*** | 28.465*** | 26.383*** | 28.956*** |
|  | (0.104) | (3.982) | (5.340) | (5.455) |
|  |  |  |  |  |
| Observations | 89759 | 111027 | 111024 | 111015 |
| R2 | 0.213 | 0.076 | 0.213 | 0.223 |

**Table 8. Model of Risk by Vaccination Status (with Numeracy)**

|  | (1) Risk | (2) Infection | (3) Hospitalization | (4) Death |
| --- | --- | --- | --- | --- |
| Party ID (Republican) | -0.171*** | -2.858*** | -3.456*** | -3.782*** |
|  | (0.021) | (0.871) | (1.108) | (1.042) |
| Wave | -0.004*** | -0.048** | -0.394*** | -0.225*** |
|  | (0.001) | (0.024) | (0.026) | (0.023) |
| Party ID X Vaccination | -0.024 | 2.437*** | 3.224*** | 2.177*** |
|  | (0.020) | (0.821) | (0.894) | (0.789) |
| Vaccination | -0.158*** | -10.693*** | -6.039*** | -4.824*** |
|  | (0.012) | (0.573) | (0.595) | (0.543) |
| Age | 0.011 | -0.180 | 5.073*** | 4.394*** |
|  | (0.010) | (0.408) | (0.511) | (0.506) |
| Children | -0.063*** | 1.251 | 0.718 | 0.680 |
|  | (0.019) | (0.805) | (1.037) | (1.017) |
| Health | 0.068*** | 3.561*** | 7.381*** | 6.621*** |
|  | (0.011) | (0.433) | (0.640) | (0.614) |
| No Comorbidity | -0.005 | -0.339 | -2.613*** | -2.146** |
|  | (0.020) | (0.833) | (0.989) | (0.965) |
| Covid | 0.045 | 0.424 | -3.600** | -3.027* |
|  | (0.030) | (1.156) | (1.659) | (1.560) |
| Covid Death | 0.022 | 2.336*** | 1.095 | 1.564** |
|  | (0.014) | (0.659) | (0.756) | (0.729) |
| Mixed Area | 0.005 | -0.559 | -0.381 | -0.587 |
|  | (0.030) | (1.191) | (1.533) | (1.470) |
| Urban Area | 0.024 | -1.080 | -0.341 | -0.005 |
|  | (0.034) | (1.316) | (1.683) | (1.644) |
| Insurance | -0.014 | -0.155 | 0.628 | 0.528 |
|  | (0.030) | (1.767) | (2.165) | (2.115) |
| Gender (male) | -0.054*** | -2.785*** | 0.771 | 0.621 |
|  | (0.020) | (0.801) | (1.036) | (1.008) |
| Education | -0.015 | -0.247 | -0.884 | -1.225* |
|  | (0.013) | (0.575) | (0.752) | (0.739) |
| Income | -0.038*** | -0.641 | -1.823*** | -1.924*** |
|  | (0.009) | (0.407) | (0.545) | (0.542) |
| Black | 0.122*** | -4.153** | -5.732*** | -5.841*** |
|  | (0.041) | (1.663) | (2.047) | (2.072) |
| Hispanic | 0.190*** | 2.137 | 2.910 | 3.379** |
|  | (0.039) | (1.529) | (1.805) | (1.642) |
| Other | 0.158*** | -1.493 | -0.483 | 0.427 |
|  | (0.034) | (1.338) | (1.808) | (1.686) |
| Numeracy | -0.002 | -0.159*** | -0.263*** | -0.376*** |
|  | (0.001) | (0.052) | (0.063) | (0.061) |
| Constant | 2.733*** | 29.488*** | 23.914*** | 27.285*** |
|  | (0.120) | (4.837) | (7.077) | (7.404) |
|  |  |  |  |  |
| Observations | 65028 | 79181 | 79178 | 79164 |
| R2 | 0.200 | 0.101 | 0.242 | 0.250 |

**Table 9. Model of Risk Over Time (with interval dummies)**

|  | (1) Risk | (2) Infection | (3) Hospitalization | (4) Death |
| --- | --- | --- | --- | --- |
| Party ID (Republican) | -0.207*** | -5.520*** | -5.977*** | -5.414*** |
|  | (0.019) | (0.882) | (1.051) | (0.965) |
| Wave | -0.001*** | 0.018 | -0.387*** | -0.207*** |
|  | (0.001) | (0.026) | (0.028) | (0.024) |
| Party ID X Wave | -0.003*** | 0.080*** | 0.067** | 0.036 |
|  | (0.001) | (0.030) | (0.032) | (0.028) |
| Vaccination | -0.037*** | -6.798*** | -3.664*** | -2.812*** |
|  | (0.014) | (0.502) | (0.615) | (0.549) |
| Age | 0.014* | -0.159 | 4.564*** | 4.351*** |
|  | (0.008) | (0.315) | (0.399) | (0.392) |
| Children | -0.060*** | 1.224* | 0.552 | 0.806 |
|  | (0.016) | (0.639) | (0.790) | (0.763) |
| Health | 0.084*** | 3.119*** | 6.423*** | 5.879*** |
|  | (0.009) | (0.363) | (0.493) | (0.471) |
| No Comorbidity | -0.017 | -0.561 | -3.253*** | -2.190*** |
|  | (0.017) | (0.667) | (0.766) | (0.738) |
| Covid | 0.053** | 0.905 | -1.321 | -1.148 |
|  | (0.025) | (0.974) | (1.252) | (1.244) |
| Covid Death | 0.044*** | 2.091*** | 1.522** | 2.070*** |
|  | (0.011) | (0.535) | (0.602) | (0.616) |
| Mixed Area | 0.017 | -0.495 | -1.275 | -1.517 |
|  | (0.025) | (0.894) | (1.116) | (1.106) |
| Urban Area | 0.024 | -0.792 | -1.076 | -0.897 |
|  | (0.028) | (1.037) | (1.259) | (1.255) |
| Insurance | -0.019 | -0.626 | -0.216 | -0.851 |
|  | (0.028) | (1.138) | (1.350) | (1.318) |
| Gender (male) | -0.034** | -2.186*** | 0.092 | -0.871 |
|  | (0.016) | (0.616) | (0.765) | (0.745) |
| Education | -0.027** | -0.505 | -1.897*** | -2.593*** |
|  | (0.011) | (0.423) | (0.535) | (0.522) |
| Income | -0.029*** | -0.831*** | -2.060*** | -2.168*** |
|  | (0.008) | (0.313) | (0.403) | (0.397) |
| Black | 0.116*** | -3.918*** | -3.297** | -3.288** |
|  | (0.031) | (1.261) | (1.498) | (1.497) |
| Hispanic | 0.159*** | 1.908 | 2.139 | 2.849** |
|  | (0.030) | (1.200) | (1.358) | (1.261) |
| Other | 0.134*** | -0.297 | 1.577 | 1.397 |
|  | (0.028) | (1.139) | (1.462) | (1.336) |
| Monthly | -0.138*** | -5.257*** | -1.589*** | -1.290*** |
|  | (0.009) | (0.391) | (0.379) | (0.324) |
| Quarterly |  | -0.696 | 1.418** | 0.064 |
|  |  | (0.568) | (0.586) | (0.518) |
| Constant | 2.639*** | 21.527*** | 14.281*** | 11.054** |
|  | (0.078) | (3.278) | (4.371) | (4.430) |
|  |  |  |  |  |
| Observations | 89759 | 111027 | 111024 | 111015 |
| R2 | 0.213 | 0.076 | 0.213 | 0.223 |

**Table 10. Model of Risk by Vaccination Status (with interval dummies)**

|  | (1) Risk | (2) Infection | (3) Hospitalization | (4) Death |
| --- | --- | --- | --- | --- |
| Party ID (Republican) | -0.173*** | -2.770*** | -3.105*** | -3.450*** |
|  | (0.019) | (0.805) | (1.034) | (0.957) |
| Wave | -0.002*** | 0.029 | -0.378*** | -0.207*** |
|  | (0.001) | (0.026) | (0.026) | (0.022) |
| Party ID X Vaccination | -0.028 | 2.166*** | 2.525*** | 1.893*** |
|  | (0.018) | (0.746) | (0.840) | (0.734) |
| Vaccination | -0.091*** | -9.491*** | -5.286*** | -3.946*** |
|  | (0.015) | (0.612) | (0.704) | (0.647) |
| Age | 0.009 | 0.024 | 5.259*** | 4.864*** |
|  | (0.009) | (0.368) | (0.461) | (0.449) |
| Children | -0.060*** | 1.443* | 0.546 | 0.856 |
|  | (0.018) | (0.756) | (0.965) | (0.939) |
| Health | 0.072*** | 3.538*** | 7.158*** | 6.399*** |
|  | (0.010) | (0.413) | (0.589) | (0.564) |
| No Comorbidity | -0.005 | -0.127 | -2.501*** | -1.774** |
|  | (0.018) | (0.771) | (0.895) | (0.867) |
| Covid | 0.045 | 1.224 | -2.687* | -1.991 |
|  | (0.028) | (1.159) | (1.572) | (1.495) |
| Covid Death | 0.021 | 2.078*** | 0.977 | 1.347** |
|  | (0.013) | (0.622) | (0.706) | (0.670) |
| Mixed Area | -0.001 | -0.749 | -0.911 | -1.177 |
|  | (0.029) | (1.133) | (1.458) | (1.411) |
| Urban Area | 0.015 | -1.387 | -1.192 | -0.517 |
|  | (0.032) | (1.252) | (1.596) | (1.564) |
| Insurance | -0.035 | 0.224 | 1.113 | 0.811 |
|  | (0.028) | (1.627) | (1.960) | (1.906) |
| Gender (male) | -0.050*** | -3.460*** | -0.498 | -1.162 |
|  | (0.017) | (0.718) | (0.924) | (0.892) |
| Education | -0.022* | -0.851* | -1.849*** | -2.664*** |
|  | (0.012) | (0.509) | (0.668) | (0.659) |
| Income | -0.040*** | -1.020*** | -2.211*** | -2.550*** |
|  | (0.008) | (0.375) | (0.490) | (0.486) |
| Black | 0.133*** | -3.192** | -3.457* | -3.619* |
|  | (0.038) | (1.526) | (1.845) | (1.903) |
| Hispanic | 0.179*** | 2.502* | 3.835** | 4.221*** |
|  | (0.034) | (1.418) | (1.674) | (1.532) |
| Other | 0.137*** | -0.838 | 1.848 | 1.110 |
|  | (0.030) | (1.333) | (1.761) | (1.599) |
| Monthly | -0.105*** | -4.171*** | -1.769*** | -1.432*** |
|  | (0.011) | (0.514) | (0.487) | (0.423) |
| Quarterly |  | 1.994*** | 2.014*** | 0.271 |
|  |  | (0.735) | (0.763) | (0.695) |
| Constant | 2.665*** | 21.223*** | 10.864** | 9.412* |
|  | (0.096) | (3.839) | (5.481) | (5.659) |
|  |  |  |  |  |
| Observations | 73026 | 89148 | 89146 | 89132 |
| R2 | 0.198 | 0.101 | 0.229 | 0.233 |

**Table 11. Model of Risk Over Time (With Media)**

|  | (1) Risk | (2) Infection | (3) Hospitalization | (4) Death |
| --- | --- | --- | --- | --- |
| Party ID (Republican) | -0.171*** | -4.500*** | -5.890*** | -4.903*** |
|  | (0.027) | (1.195) | (1.314) | (1.170) |
| Wave | -0.007*** | -0.195*** | -0.374*** | -0.181*** |
|  | (0.001) | (0.047) | (0.052) | (0.048) |
| Party ID X Wave | -0.003*** | 0.062 | 0.081* | 0.042 |
|  | (0.000) | (0.041) | (0.042) | (0.036) |
| Use Fox News | 0.009 | 0.468 | -0.118 | -0.257 |
|  | (0.017) | (0.651) | (0.820) | (0.785) |
| Use CNN | -0.060*** | -1.506** | -0.420 | -0.147 |
|  | (0.014) | (0.599) | (0.762) | (0.745) |
| Use MSNBC | -0.009 | -1.106 | -1.282 | -1.502 |
|  | (0.014) | (0.688) | (0.893) | (0.896) |
|  |  |  |  |  |
| Observations | 45671 | 52283 | 52281 | 52288 |
| R2 | 0.222 | 0.093 | 0.192 | 0.197 |

Controls omitted from table.

**Table 12. Model of Risk by Vaccination Status (With Media)**

|  | (1) Risk | (2) Infection | (3) Hospitalization | (4) Death |
| --- | --- | --- | --- | --- |
| Party ID (Republican) | -0.151*** | -1.540* | -2.556** | -2.727*** |
|  | (0.023) | (0.924) | (1.107) | (1.055) |
| Vaccination | -0.148*** | -10.907*** | -5.874*** | -4.555*** |
|  | (0.012) | (0.605) | (0.655) | (0.615) |
| Party ID X Vaccination | -0.022 | 2.056** | 2.506** | 1.905** |
|  | (0.020) | (0.918) | (1.038) | (0.903) |
| Use Fox News | 0.034* | 0.119 | -0.050 | 0.321 |
|  | (0.019) | (0.759) | (0.993) | (0.955) |
| Use CNN | -0.053*** | -1.738*** | -0.595 | -0.345 |
|  | (0.015) | (0.634) | (0.803) | (0.787) |
| Use MSNBC | -0.013 | -1.096 | -.896 | -0.478 |
|  | (0.016) | (0.744) | (0.961) | (0.967) |
|  |  |  |  |  |
| Observations | 33620 | 37814 | 37813 | 37815 |
| R2 | 0.211 | 0.119 | 0.219 | 0.223 |

Controls omitted from table.

**Table 13. Model of Risk Over Time (With Social Media)**

|  | (1) Risk | (2) Infection | (3) Hospitalization | (4) Death |
| --- | --- | --- | --- | --- |
| Party ID (Republican) | -0.167*** | -4.917*** | -6.291*** | -4.921*** |
|  | (0.029) | (1.277) | (1.408) | (1.290) |
| Wave | -0.007*** | -0.201*** | -0.366*** | -0.180*** |
|  | (0.001) | (0.049) | (0.058) | (0.053) |
| Party ID X Wave | -0.003*** | 0.086** | 0.093** | 0.036 |
|  | (0.001) | (0.044) | (0.045) | (0.040) |
| Use Social Media | -0.024*** | 0.043 | -0.412 | -0.533* |
|  | (0.007) | (0.253) | (0.321) | (0.314) |
|  |  |  |  |  |
| Observations | 36914 | 42257 | 42251 | 42259 |
| R2 | 0.227 | 0.093 | 0.202 | 0.205 |

Controls omitted from table.

**Table 14. Model of Risk by Vaccination Status (With Social Media)**

|  | (1) Risk | (2) Infection | (3) Hospitalization | (4) Death |
| --- | --- | --- | --- | --- |
| Party ID (Republican) | -0.154*** | -1.483 | -2.724** | -2.990** |
|  | (0.025) | (1.011) | (1.225) | (1.172) |
| Vaccination | -0.155*** | -11.329*** | -6.328*** | -5.073*** |
|  | (0.013) | (0.650) | (0.704) | (0.658) |
| Party ID X Vaccination | -0.018 | 2.660*** | 3.323*** | 2.609*** |
|  | (0.021) | (0.995) | (1.111) | (0.975) |
| Use Social Media | -0.019** | 0.284 | 0.0219 | -0.068 |
|  | (0.007) | (0.293) | (0.955) | (0.372) |
|  |  |  |  |  |
| Observations | 27177 | 30530 | 30527 | 30530 |
| R2 | 0.218 | 0.123 | 0.230 | 0.233 |

Controls omitted from table.

**Table 15. Model of Risk Over Time (Fixed Effects)**

|  | (1) Risk | (2) Infection | (3) Hospitalization | (4) Death |
| --- | --- | --- | --- | --- |
| Party ID (Republican) | Omitted | Omitted | Omitted | Omitted |
|  |  |  |  |  |
| Wave | -0.004*** | -0.133*** | -0.431*** | -0.269*** |
|  | (0.002) | (0.014) | (0.015) | (0.013) |
| Party ID X Wave | -0.030*** | 0.106** | 0.093*** | 0.079*** |
|  | (0.003) | (0.019) | (0.021) | (0.018) |
|  |  |  |  |  |
| Observations | 105,086 | 129,868 | 129,869 | 129,859 |
| R2 | 0.023 | 0.0002 | 0.007 | 0.044 |

Controls omitted from table.

**Table 16. Model of Risk by Vaccination Status (Fixed Effects)**

|  | (1) Risk | (2) Infection | (3) Hospitalization | (4) Death |
| --- | --- | --- | --- | --- |
| Party ID (Republican) | Omitted | Omitted | Omitted | Omitted |
|  |  |  |  |  |
| Vaccination | -0.163*** | -11.634*** | -6.988*** | -5.488*** |
|  | (0.049) | (0.333) | (0.347) | (0.329) |
| Party ID X Vaccination | -0.003 | 3.139*** | 2.541*** | 2.367*** |
|  | (0.007) | (0.499) | (0.526) | (0.481) |
|  |  |  |  |  |
| Observations | 105,086 | 129,868 | 129,869 | 129,859 |
| R2 | 0.015 | 0.0003 | 0.007 | 0.046 |

Controls omitted from table.

**Table 17. Observations by Wave**

| Wave | Observations |
| --- | --- |
| 1 | 6,932 |
| 2 | 5,478 |
| 3 | 6,287 |
| 4 | 6,403 |
| 5 | 6,407 |
| 6 | 6,408 |
| 7 | 6,346 |
| 8 | 6,077 |
| 9 | 6,289 |
| 10 | 6,371 |
| 11 | 6,238 |
| 12 | 6,262 |
| 13 | 6,284 |
| 14 | 6,219 |
| 15 | 6,095 |
| 16 | 6,181 |
| 17 | 6,276 |
| 18 | 6,084 |
| 19 | 6,060 |
| 20 | 6,078 |
| 21 | 6,066 |
| 22 | 6,179 |
| 23 | 6,231 |
| 24 | 6,344 |
| 25 | 6,210 |
| 26 | 6,092 |
| 27 | 6,052 |
| 28 | 5,964 |
| 29 | 5,839 |
| 30 | 7,060 |
| Total | 186,722 |


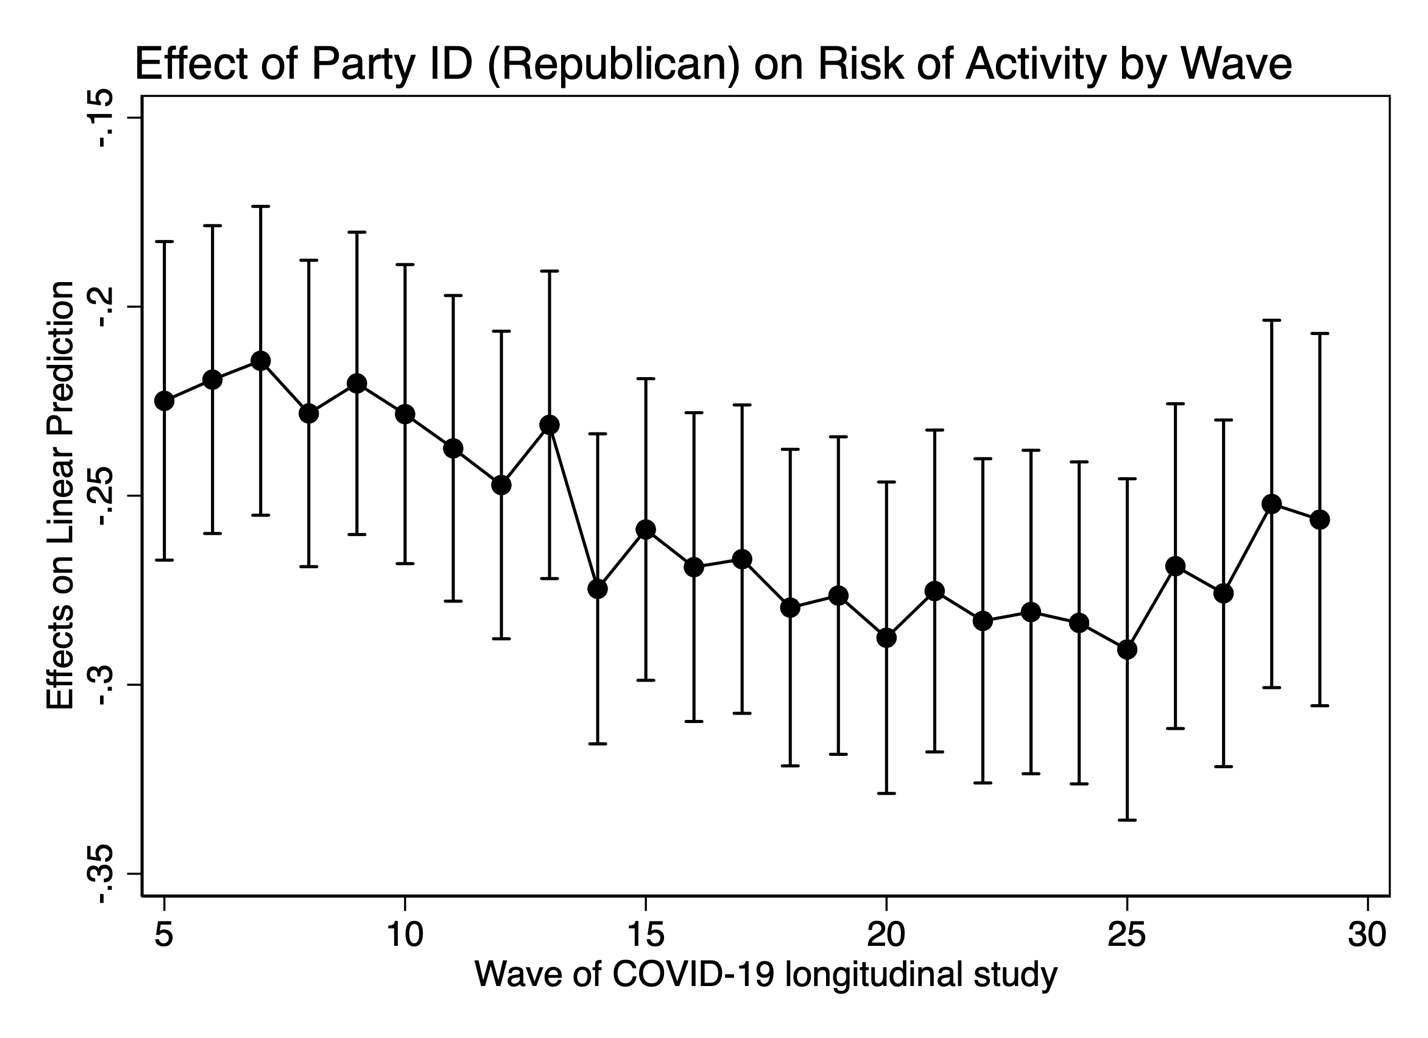


**Figure 1A.**
